# Supplementary material for: Non-productive angiogenesis disassembles Aß plaque-associated blood vessels
Source: PubMed Central journal article supplement (PMC8149638; doi:10.1038/s41467-021-23337-z), 2021-05-25
Supplement: 41467_2021_23337_MOESM3_ESM.pdf [file 41467_2021_23337_MOESM3_ESM.pdf]

## Description of Additional Supplementary Files

File Name: Supplementary Data 1

Description: A description of the main characteristics of the samples used per experiment.

File Name: Supplementary Data 2

Description: Differentially expressed genes between *APP-PSEN1/+* and WT endothelial cells.

File Name: Supplementary Data 3

Description: Gene set enrichment analysis (GSEA) between *APP-PSEN1/+* and WT endothelial cells.

File Name: Supplementary Movie 1

Description: iDisco analysis of an *APP-PSEN1/+* brain stained with the vascular/VaS marker IB4.

File Name: Supplementary Movie 2

Description: Z-stack of the confocal projection presented in Figure 6a.

File Name: Supplementary Movie 3

Description: 3D reconstruction of the confocal projection presented in Figure 6a.

File Name: Supplementary Movie 4

Description: 3D reconstruction of the confocal projection presented in Figure 6c.

File Name: Supplementary Movie 5

Description: 3D reconstruction of a confocal projection similar to the one presented in Figure 6c.

File Name: Supplementary Movie 6

Description: 3D reconstruction of the confocal projection presented in SFigure 7d.

File Name: Supplementary Movie 7

Description: 3D reconstruction of a confocal projection similar to the one presented in Figure 6c.

File Name: Supplementary Movie 8

Description: 3D reconstruction of the confocal projection presented in Figure 6d.

File Name: Supplementary Movie 9

Description: 3D reconstruction of a confocal projection similar to the one presented in Figure 6d.

File Name: Supplementary Movie 10

Description: Z-stack of a confocal projection similar to the one presented in Figure 6d.
